# Supplementary material for: CHH Methylation Islands: A Nonconserved Feature of Grass Genomes That Is Positively Associated with Transposable Elements but Negatively Associated with Gene-Body Methylation
Source: PubMed Central journal article supplement (PMC8374106; doi:10.1093/gbe/evab144), 2021-06-19
Supplement: evab144_supplementary_data.pdf [file evab144_supplementary_data.pdf]

Supplemental Figures and Tables

**CHH Methylation Islands: A non-conserved feature of grass genomes that is positively associated with transposable elements but negatively associated with gene-body methylation**

Galen T. Martin<sup>1</sup>, Danelle K. Seymour<sup>2</sup>, Brandon S. Gaut<sup>1,\*</sup>

S1

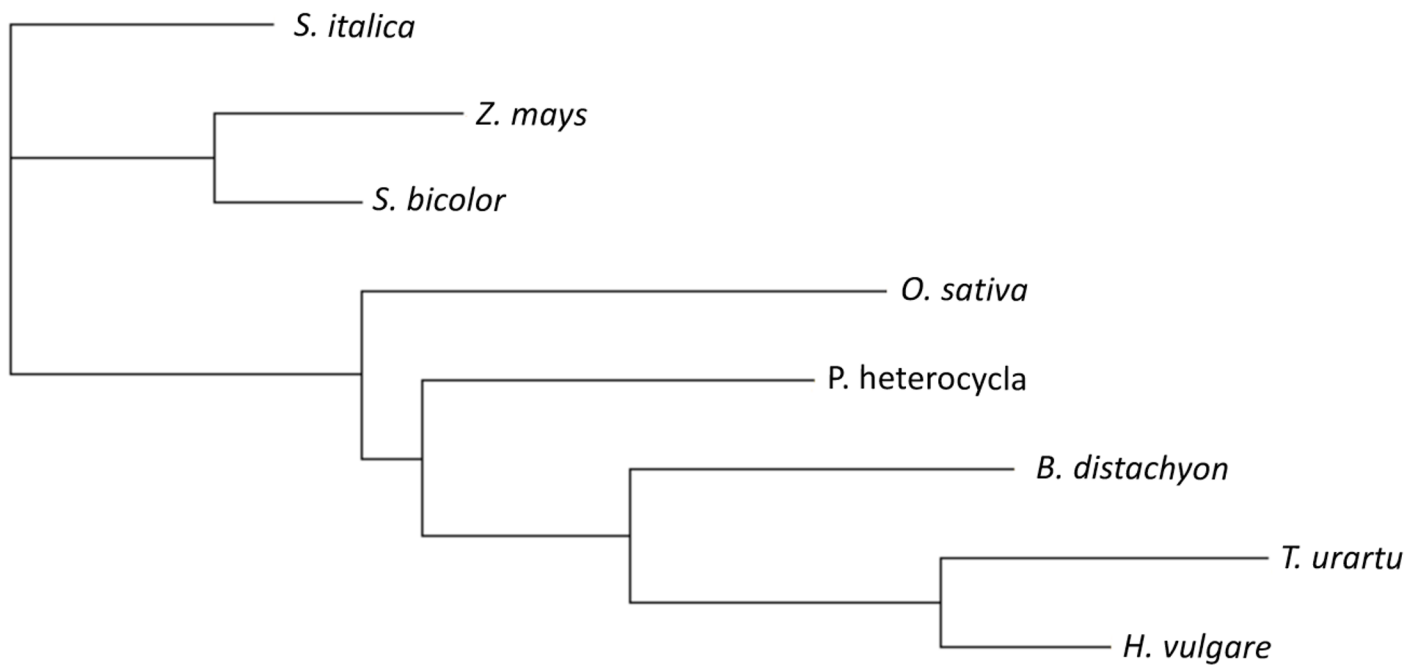

**Figure S1.** Maximum likelihood phylogeny of the eight Poaceae species used in this study, inferred from single-copy orthologous genes.

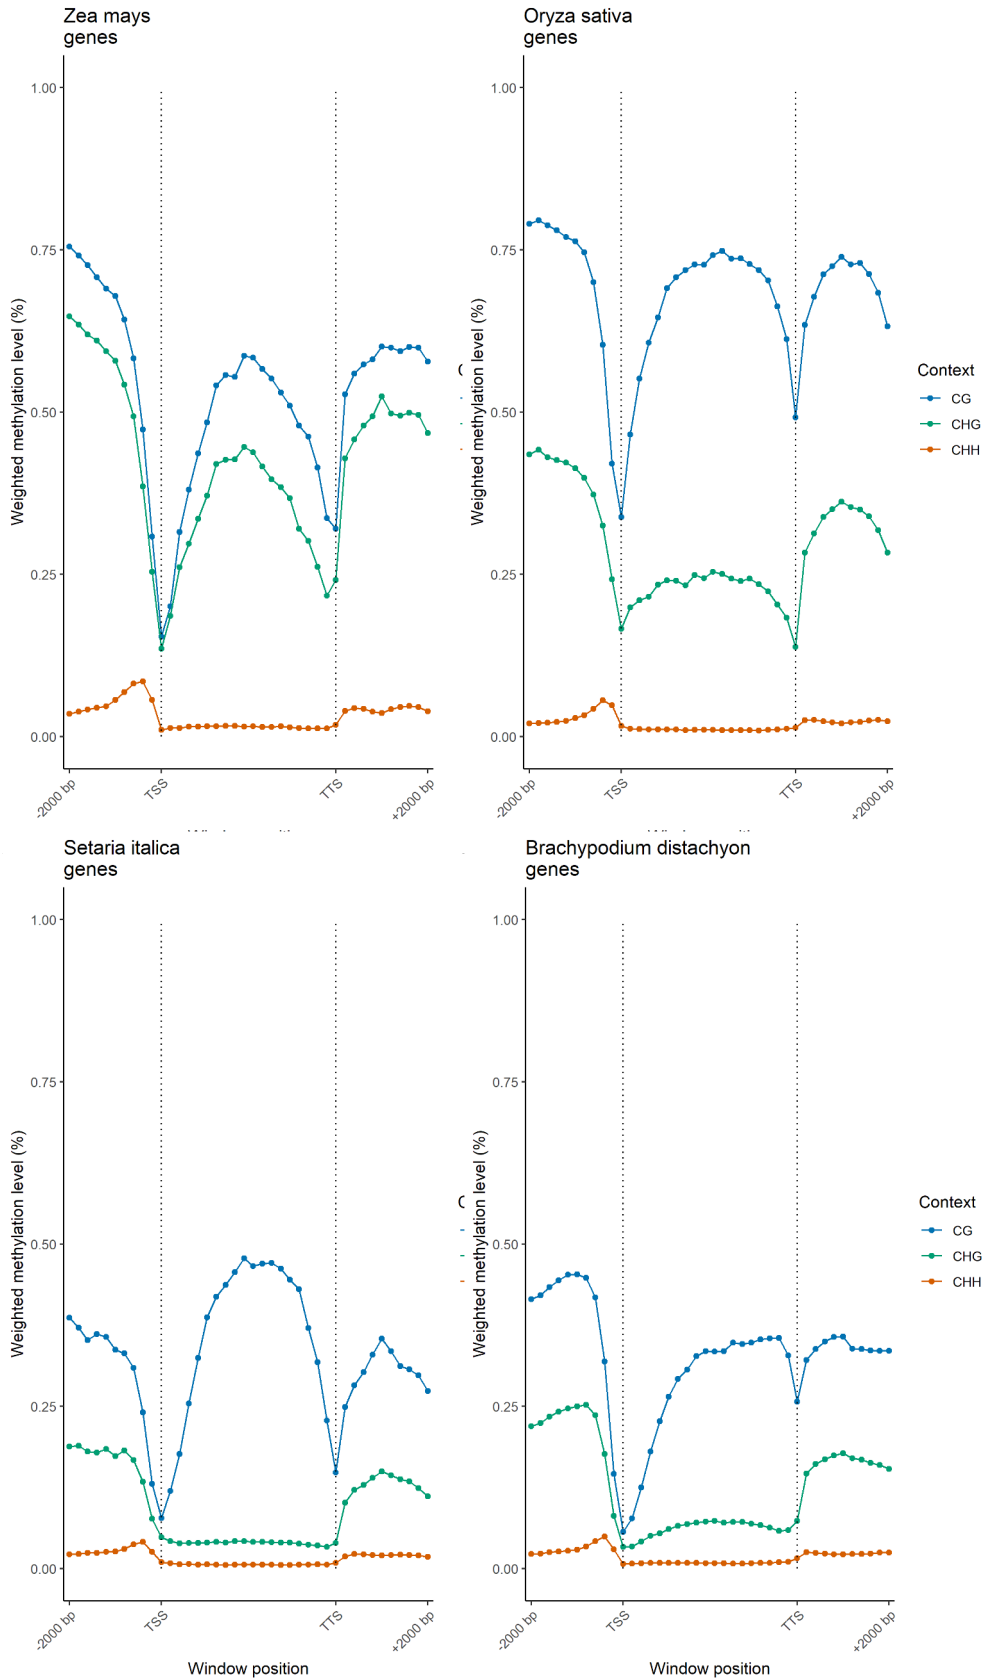

# S2. continued

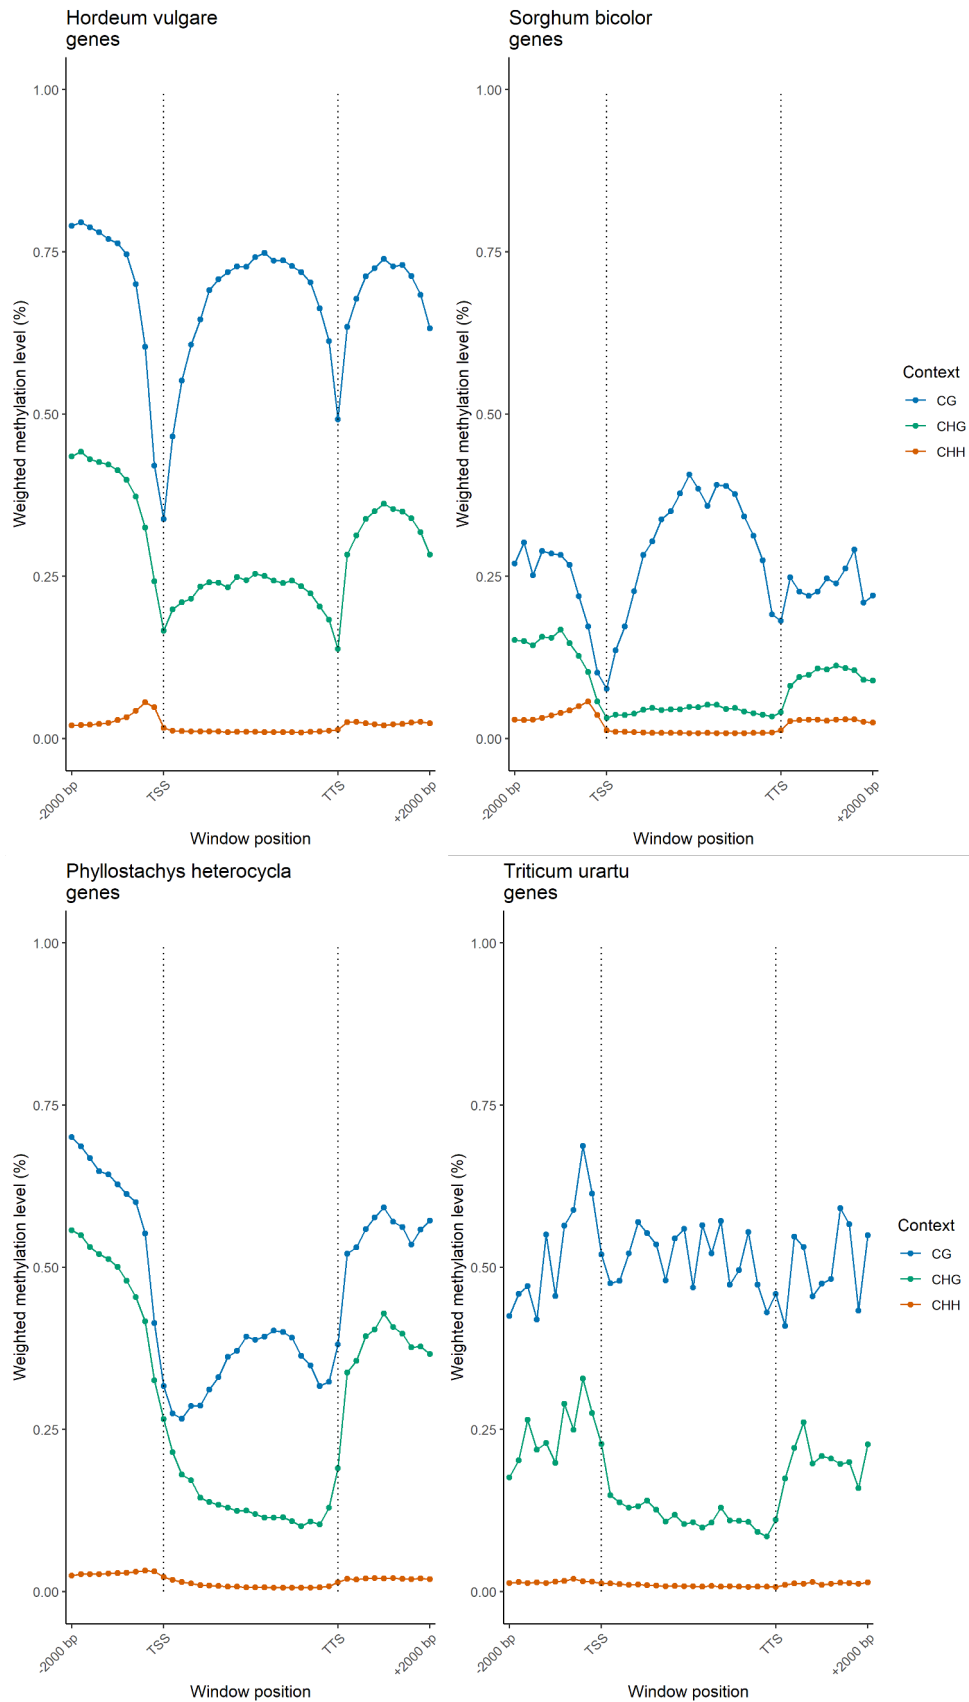

## S2. continued

**Figure S2.** Metaprofiles summarizing methylation levels in all three contexts across genes and near-gene regions. Weighted methylation levels were calculated in 100 bp windows 2 kb upstream and downstream of genes, and transcription start sites (TSS) and transcription termination sites (TTS) are marked by dotted lines.

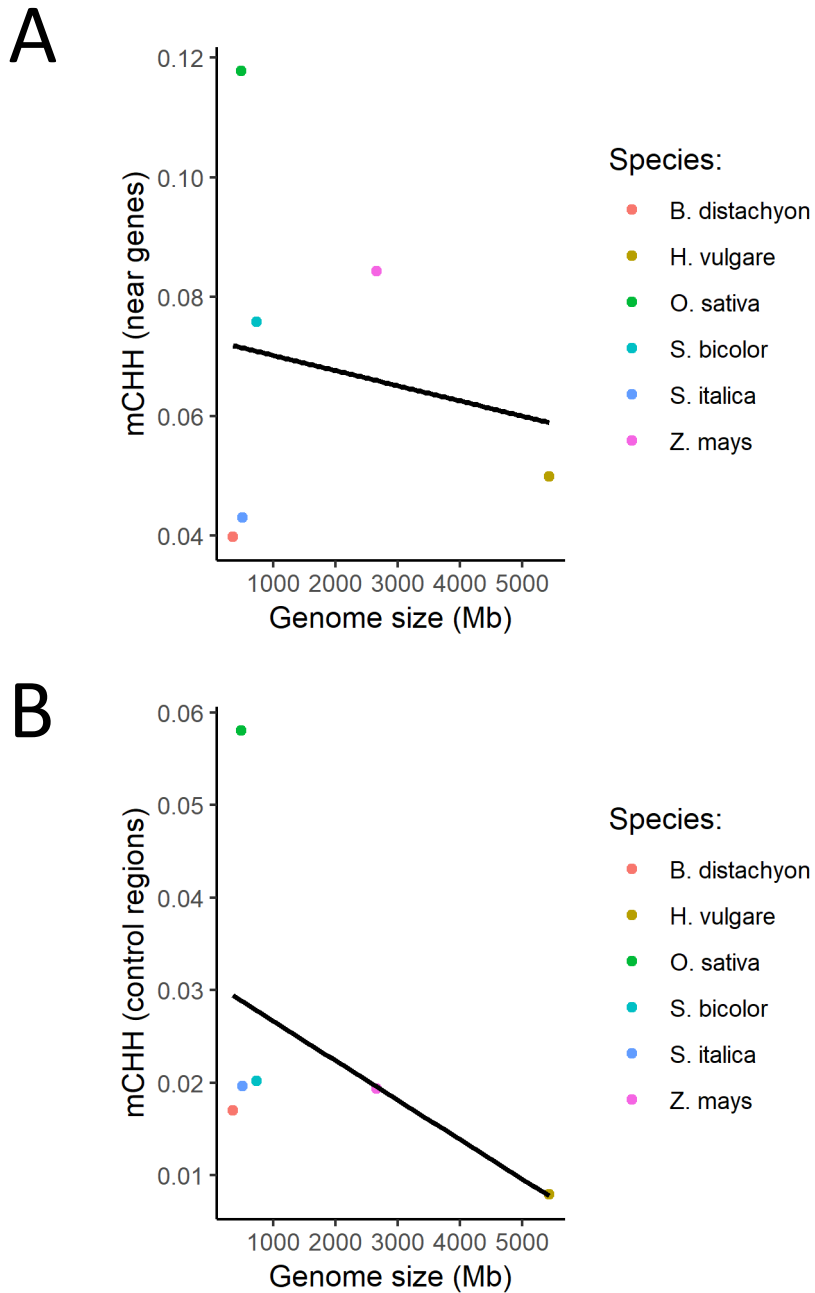

**Figure S3.** Correlations between GS and mCHH levels near genes (S3a) and among control sites (S3b). These figures represent the numerator and denominator of Figure 1b respectively.

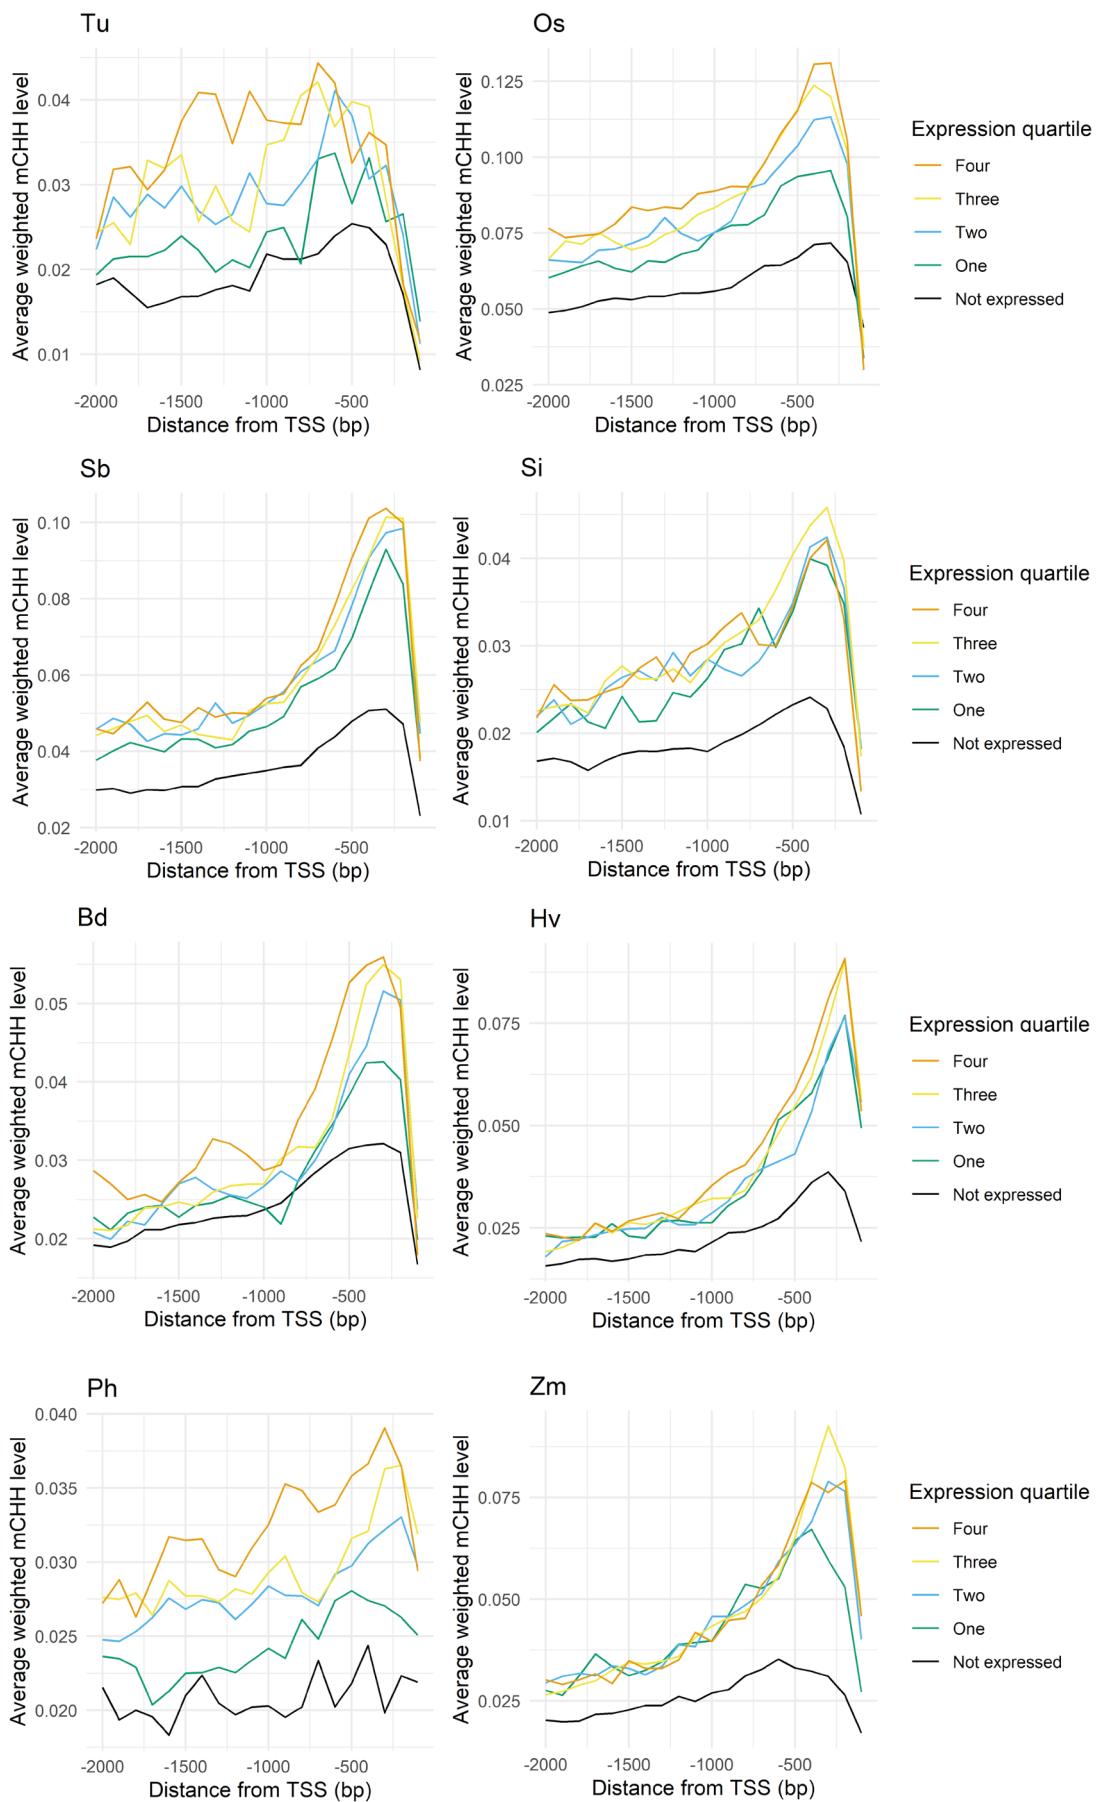

**Figure S4.** Metaprofiles of mCHH levels across 5' near-gene regions in genes separated into nonexpressed genes and four quartiles of expression (quartile one being those with the lowest expression, and four with highest).



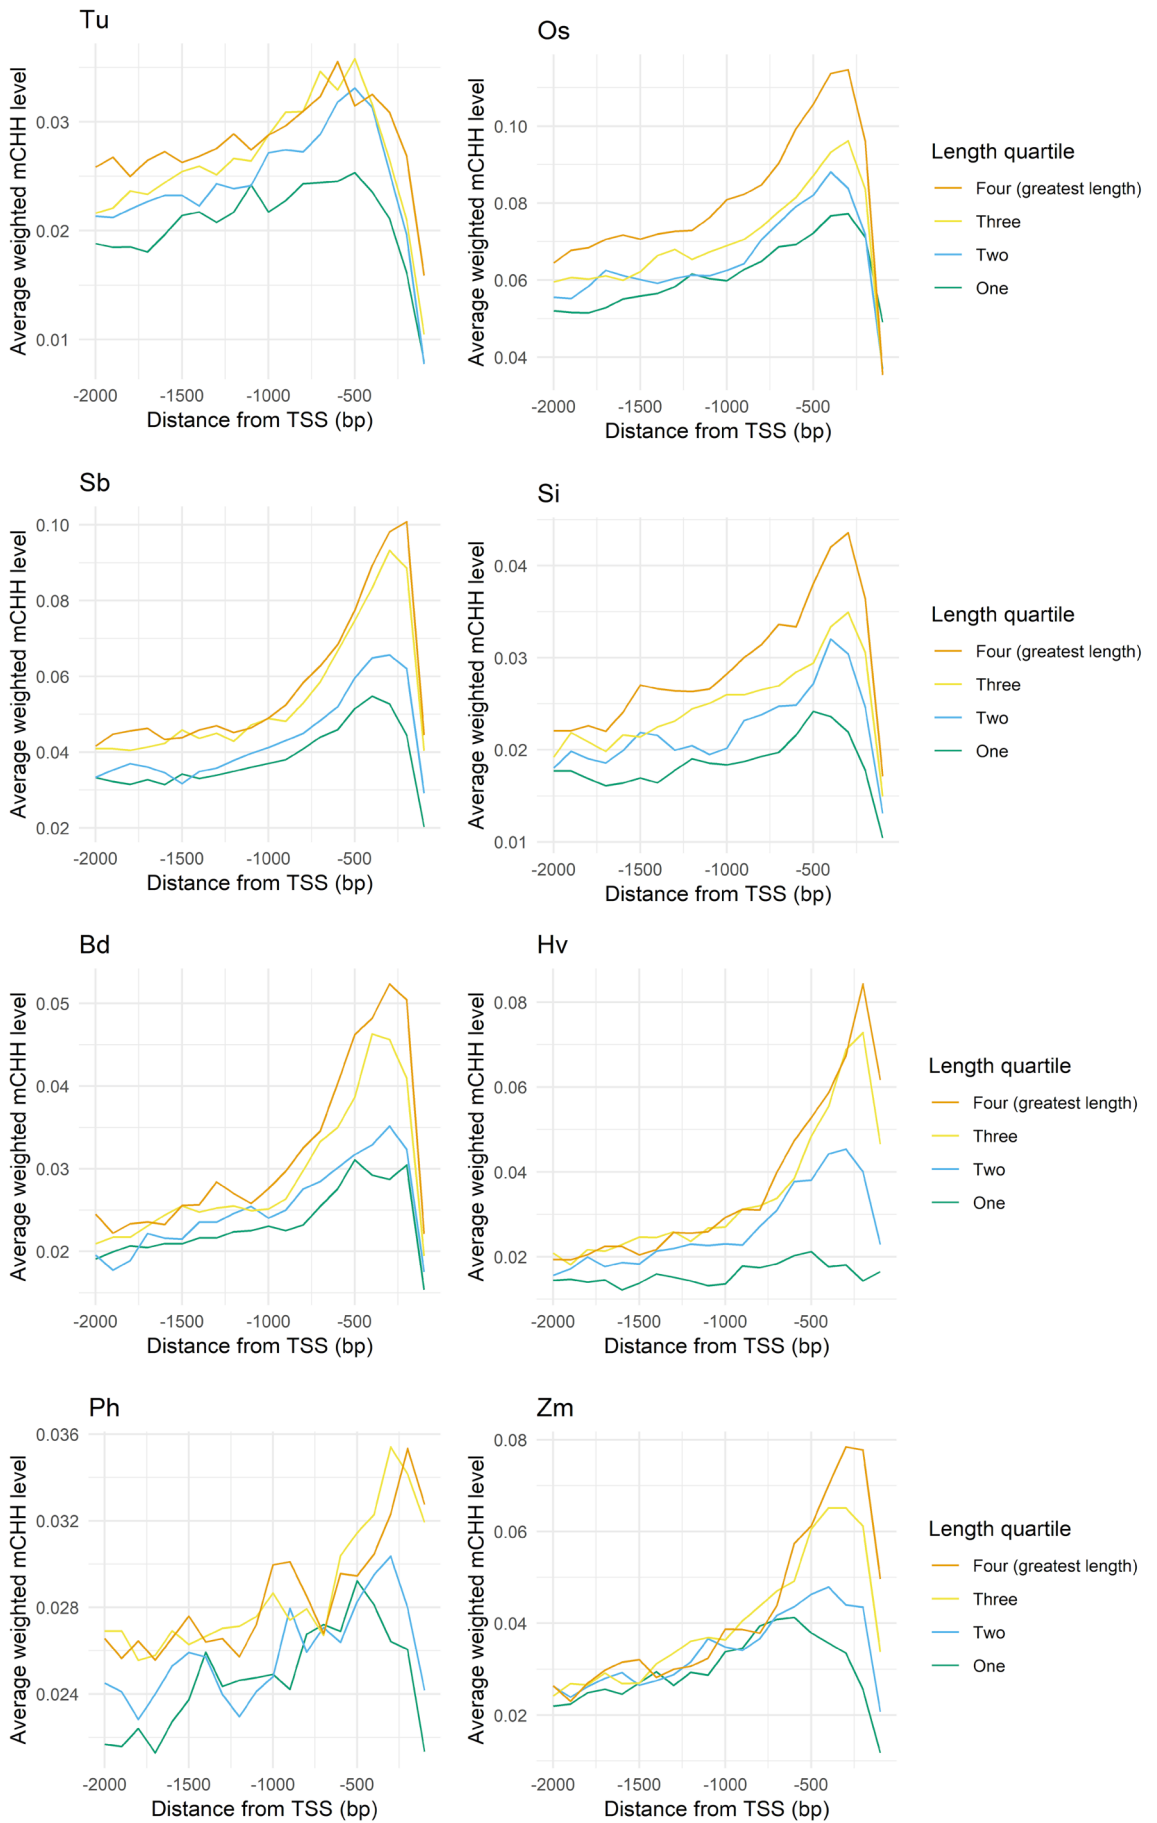

**Figure S5.** Metaprofiles of mCHH levels across 5' near-gene regions in genes separated into four quartiles of length.

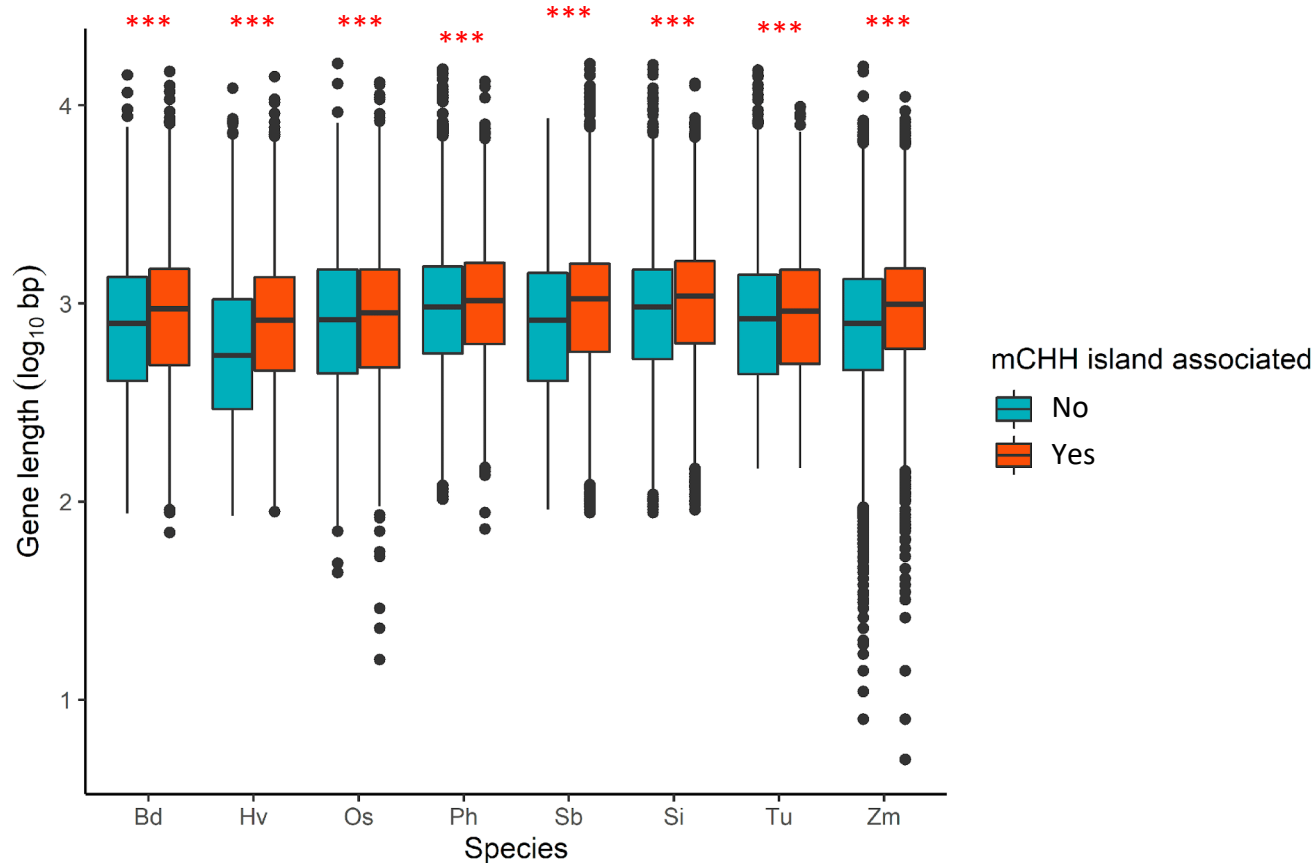

**Figure S6.** Length of longest transcript between mCHH island associated genes and other genes. Boxplots show the four quartiles of the transcript length distributions in each species, and middle lines represent median. Significance was established by replacing full gene length with transcript length in the logistic regression model from the main text.

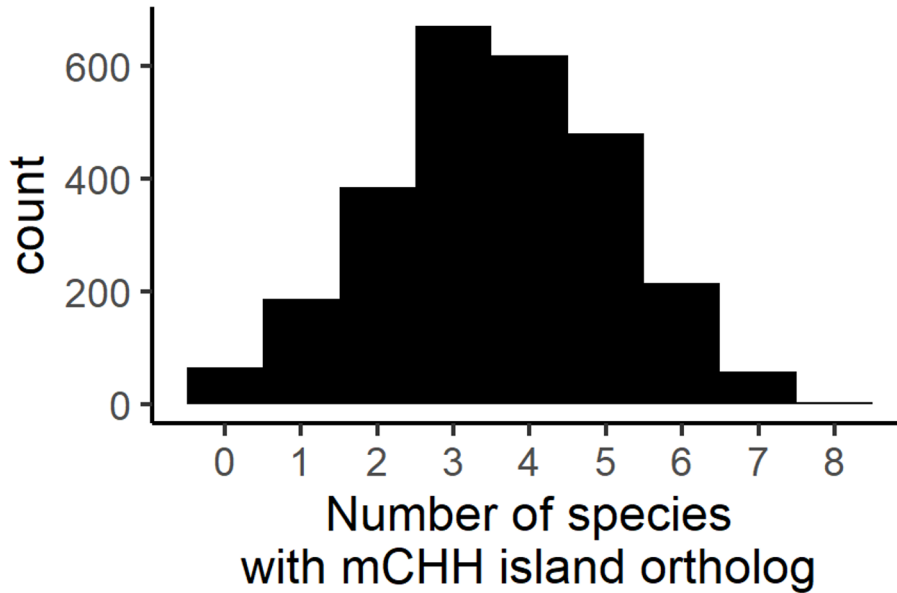

**Figure S7.** Histogram illustrating the distribution of mCHH island conservation among orthologs of the eight species. The numbers on the x-axis represent the number of species in which orthologs were mCHH island associated. The count on the y-axis is the number of orthologs.

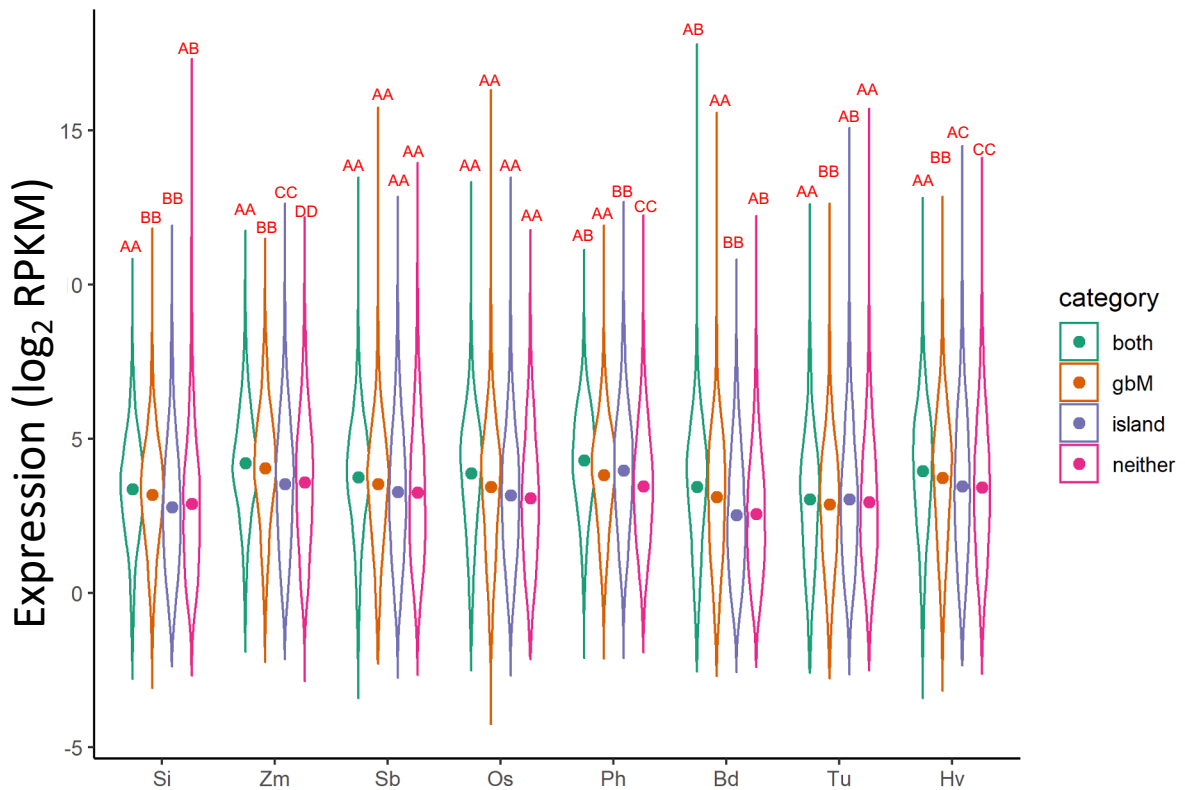

**Figure S8.** Gene expression levels between categories of gbM genes, mCHH island associated genes, genes with both and genes with neither. Genes were separated into four non-overlapping categories: mCHH island only, gbM only, both island and gbM, and neither. Violin plots depict distributions of expression within each category, with mean values marked by dots. Letter codes represent significance ( $P < 0.05$ , unpaired t-test), where any distributions that share a letter (e.g., AB and AA) are not significantly different but those that do not share letters (e.g., AA and BB) are significantly different. All comparisons are within, not between, species.

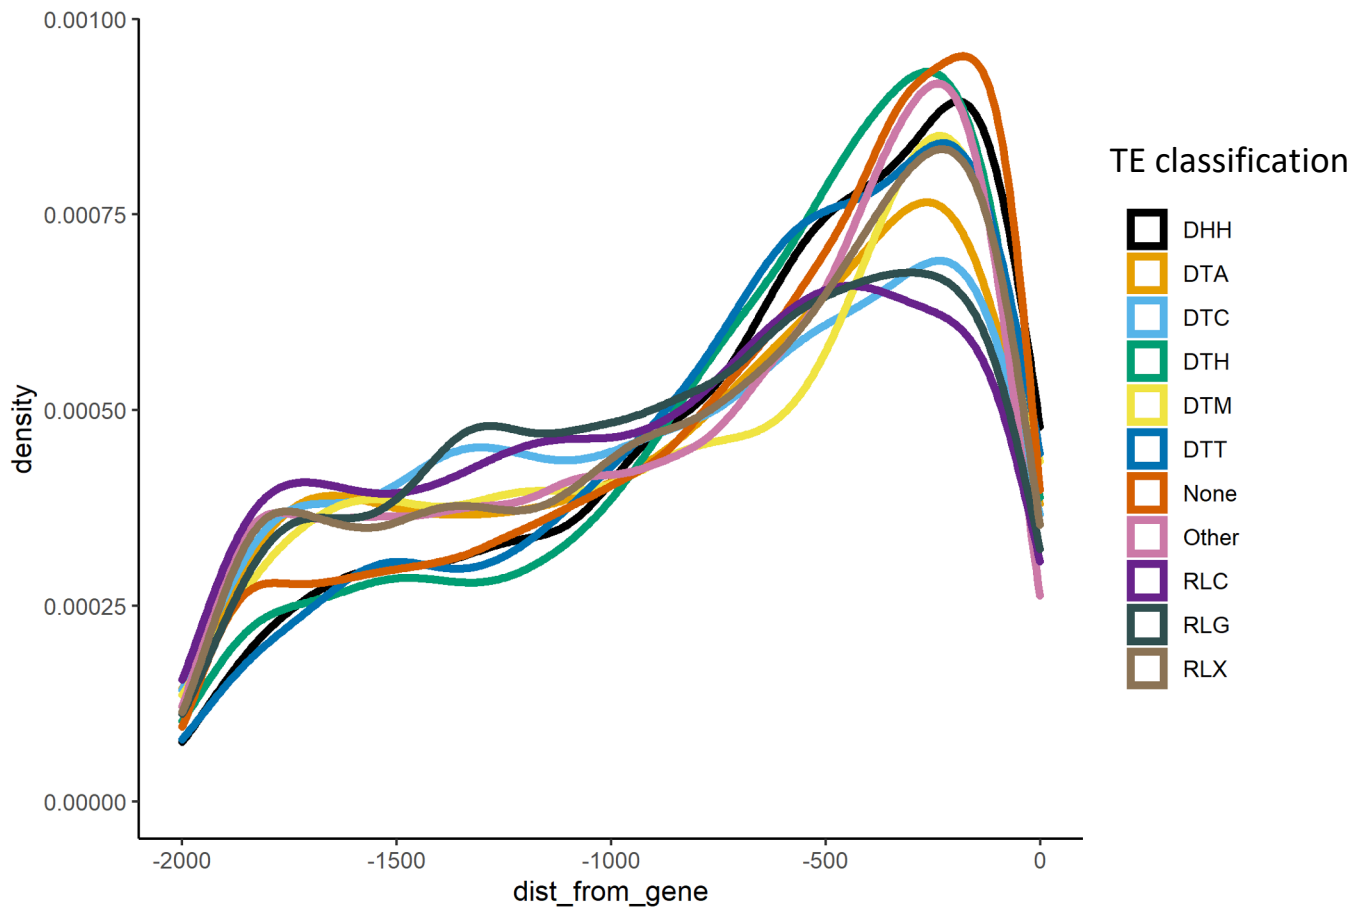

**Figure S9.** Distributions of distances from the gene TSS to mCHH islands located within different types of TEs and not within TEs (“None”). These distributions include data from all three species.

## Supplemental Table 1. Reference statistics

| Species               | # contigs | Largest contig size (bp) | Total Length (bp) | N50 (bp) | N50 / Total Length |
|-----------------------|-----------|--------------------------|-------------------|----------|--------------------|
| <i>O. sativa</i>      | 63        | 4.33E+07                 | 3.75E+08          | 3.00E+07 | 0.07988            |
| <i>H. vulgare</i>     | 10        | 7.68E+08                 | 4.83E+09          | 6.57E+08 | 0.13595            |
| <i>P. heterocykla</i> | 277278    | 4.87E+06                 | 2.05E+09          | 3.29E+05 | 0.00016            |
| <i>S. bicolor</i>     | 867       | 8.09E+07                 | 7.09E+08          | 6.87E+07 | 0.09687            |
| <i>S. italica</i>     | 336       | 5.90E+07                 | 4.06E+08          | 4.73E+07 | 0.11646            |
| <i>T. urartu</i>      | 248855    | 1.07E+06                 | 3.68E+09          | 8.76E+04 | 0.00002            |
| <i>Z. mays</i>        | 267       | 3.07E+08                 | 2.14E+09          | 2.24E+08 | 0.10487            |
| <i>B. distachyon</i>  | 10        | 7.51E+07                 | 2.71E+08          | 5.91E+07 | 0.21806            |

## Supplemental Table 2. Logistic regression on predictors of mCHH island presence

| Species                          | Expression            |                              | Distance to nearest TE |                 | Gene length |                 | Exonic mCG |                 |
|----------------------------------|-----------------------|------------------------------|------------------------|-----------------|-------------|-----------------|------------|-----------------|
|                                  | Estimate <sup>1</sup> | <i>p</i> -value <sup>2</sup> | Estimate               | <i>p</i> -value | Estimate    | <i>p</i> -value | Estimate   | <i>p</i> -value |
| <i>Oryza sativa</i>              | -6.43E-01             | 7.48E-01                     | -8.54E-04              | 0.00E+00        | 7.09E+00    | 1.13E-111       | -1.36E+00  | 0.00E+00        |
| <i>Sorghum bicolor</i>           | -1.81E+00             | 3.00E-01                     | -7.42E-04              | 0.00E+00        | 5.62E+00    | 9.31E-61        | -7.35E-01  | 3.57E-86        |
| <i>Zea mays</i>                  | 2.94E+00              | 3.12E-05                     | -3.76E-05              | 2.52E-41        | 3.38E+00    | 1.03E-39        | -1.60E+00  | 0.00E+00        |
| <i>Hordeum vulgare</i>           | 2.62E+00              | 3.50E-02                     | -3.19E-04              | 9.78E-187       | 8.93E-01    | 6.57E-02        | -1.08E+00  | 3.59E-257       |
| <i>Brachypodium distachyon</i>   | 4.59E-01              | 8.18E-01                     | -5.37E-05              | 1.71E-47        | 3.74E+00    | 6.98E-81        | -6.44E-01  | 4.58E-83        |
| <i>Setaria italica</i>           | -8.05E-01             | 7.82E-01                     | -7.64E-04              | 0.00E+00        | 3.53E+00    | 4.61E-47        | -3.69E-01  | 1.32E-17        |
| <i>Triticum urartu</i>           | 5.85E-01              | 6.89E-01                     | -2.19E-04              | 4.80E-16        | 1.38E+00    | 5.65E-04        | -8.38E-01  | 1.45E-101       |
| <i>Phyllostachys heterocykla</i> | 1.03E+01              | 6.77E-21                     | -4.03E-04              | 1.43E-68        | 4.33E-01    | 6.45E-02        | -7.61E-01  | 2.03E-45        |

<sup>1</sup> Estimate of the effect of the predictor

<sup>2</sup> *P*-value of significance for the estimated effect of the predictor

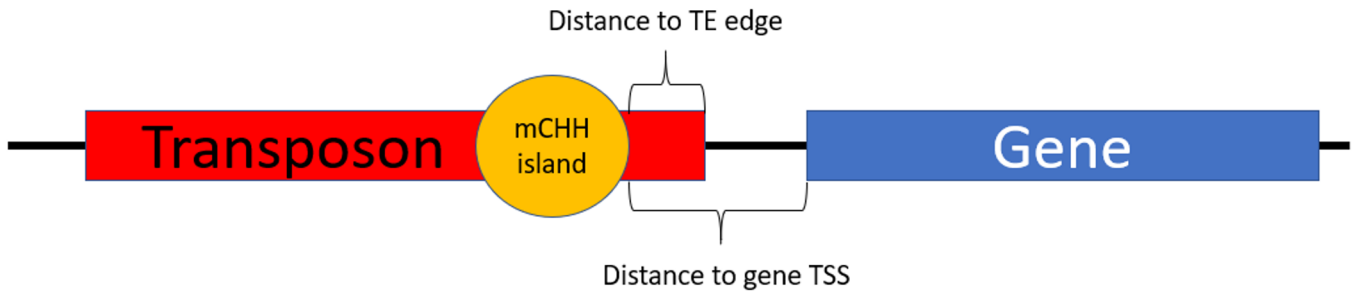

Supplemental Table 3. Coefficients of variation in mCHH island-gene distance vs mCHH island-TE edge distance

| Species <sup>1</sup> | TE classification <sup>2</sup> | Gene distance CV | TE distance CV | P value <sup>3</sup> | Test statistic <sup>3</sup> | # Cases <sup>4</sup> | Mean distance to TE edge | Mean distance to gene TSS |
|----------------------|--------------------------------|------------------|----------------|----------------------|-----------------------------|----------------------|--------------------------|---------------------------|
| Hv                   | Other                          | 0.80             | 1.77           | 0                    | 4.83E+04                    | 2527                 | 81.26                    | 672.78                    |
| Hv                   | DTM                            | 0.86             | 0.91           | 0                    | 8.17E+05                    | 119                  | 77.18                    | 660.48                    |
| Hv                   | RLX                            | 0.76             | 1.23           | 0                    | 2.02E+05                    | 3149                 | 127.52                   | 744.76                    |
| Hv                   | RLG                            | 0.69             | 1.33           | 0                    | 2.29E+04                    | 696                  | 178.93                   | 813.62                    |
| Hv                   | DTA                            | NA               | NA             | NA                   | NA                          | 1                    | 14.00                    | 93.00                     |
| Hv                   | RLC                            | 0.66             | 1.16           | 0                    | 4.39E+04                    | 958                  | 188.97                   | 862.32                    |
| Hv                   | DTC                            | 0.74             | 1.27           | 0                    | 3.58E+04                    | 732                  | 110.21                   | 776.24                    |
| Hv                   | DTT                            | 0.82             | 0.77           | 0                    | 5.53E+05                    | 124                  | 38.51                    | 643.79                    |
| Hv                   | DTH                            | 0.78             | 1.08           | 0                    | 3.26E+04                    | 213                  | 122.81                   | 656.64                    |
| Hv                   | DHH                            | 0.54             | 2.09           | 2.74E-07             | 2.64E+01                    | 6                    | 143.33                   | 885.17                    |
| Os                   | Other                          | 0.67             | 1.19           | 0                    | 6.59E+05                    | 14574                | 72.15                    | 841.81                    |
| Os                   | DTM                            | 0.67             | 1.07           | 0                    | 4.21E+04                    | 600                  | 118.71                   | 852.06                    |
| Os                   | RLX                            | 0.66             | 1.62           | 0                    | 7.64E+04                    | 4963                 | 191.86                   | 859.51                    |
| Os                   | RLG                            | 0.60             | 1.24           | 0                    | 2.26E+04                    | 821                  | 383.82                   | 935.37                    |
| Os                   | DTA                            | 0.65             | 1.16           | 0                    | 8.90E+03                    | 200                  | 88.42                    | 884.95                    |
| Os                   | RLC                            | 0.62             | 1.49           | 0                    | 1.10E+04                    | 648                  | 259.71                   | 926.34                    |
| Os                   | DTC                            | 0.58             | 1.46           | 0                    | 5.10E+03                    | 334                  | 311.80                   | 977.07                    |
| Os                   | DTT                            | 0.77             | 0.55           | 3.26E-127            | 5.76E+02                    | 5                    | 66.60                    | 948.60                    |
| Os                   | DTH                            | 0.53             | 1.84           | 2.23E-20             | 8.56E+01                    | 13                   | 188.69                   | 935.85                    |
| Os                   | DHH                            | 0.47             | 0.68           | 4.47E-75             | 3.36E+02                    | 4                    | 105.00                   | 396.25                    |
| Zm                   | Other                          | 0.63             | 1.06           | 0                    | 3.70E+03                    | 64                   | 135.41                   | 816.39                    |
| Zm                   | DTM                            | 1.05             | 2.07           | 0                    | 1.56E+03                    | 64                   | 121.58                   | 515.03                    |
| Zm                   | RLX                            | 0.70             | 0.89           | 0                    | 8.44E+04                    | 302                  | 706.97                   | 767.25                    |
| Zm                   | RLG                            | 0.56             | 1.29           | 0                    | 1.16E+04                    | 561                  | 234.79                   | 865.79                    |
| Zm                   | DTA                            | 0.73             | 0.85           | 0                    | 1.97E+05                    | 305                  | 117.78                   | 778.33                    |
| Zm                   | RLC                            | 0.54             | 0.98           | 0                    | 2.00E+04                    | 471                  | 372.23                   | 1012.97                   |
| Zm                   | DTC                            | 0.50             | 1.16           | 3.59E-231            | 1.05E+03                    | 51                   | 115.24                   | 964.25                    |
| Zm                   | DTT                            | 0.70             | 1.31           | 0                    | 1.59E+04                    | 425                  | 94.87                    | 731.58                    |
| Zm                   | DTH                            | 0.73             | 1.11           | 0                    | 9.19E+04                    | 1049                 | 79.44                    | 728.49                    |
| Zm                   | DHH                            | 0.76             | 1.03           | 0                    | 1.95E+05                    | 1149                 | 552.83                   | 683.98                    |

<sup>1</sup> Hv = *Hordeum vulgare*, Os = *Oryza sativa*, Zm = *Zea mays*

<sup>2</sup> TE classification codes from Wicker 2007

<sup>3</sup> Fultz and Miller asymptotic test for CV equality

<sup>4</sup> Total number of TE-mCHH islands analyzed in each category



## Unique mCHH island/TE coincidence

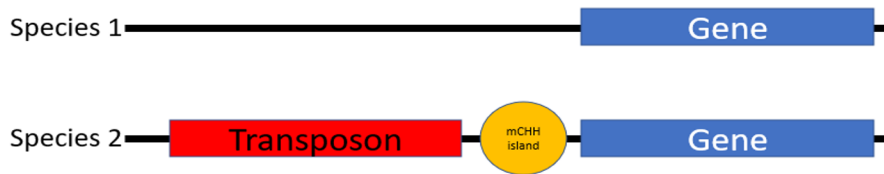

## Unique mCHH island/TE dissonance

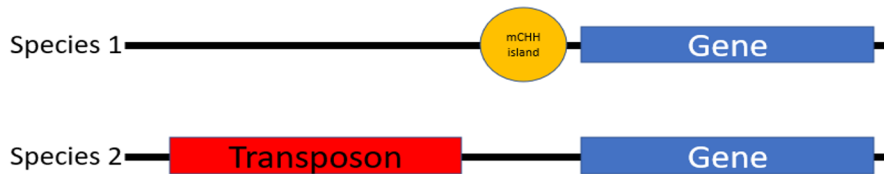

Supplemental Table 4. Coincidence vs dissonance of lineage-specific mCHH islands and TEs

| Comparison (TE, species 1, species 2) <sup>1</sup> | Observed unique island/TE coincidence <sup>2</sup> | Expected unique island/TE coincidence <sup>3</sup> | Enrichment unique island/TE coincidence <sup>4</sup> | Observed unique island/TE dissonance | Expected unique island/TE dissonance | Enrichment unique island/TE dissonance | Chi-square statistic <sup>5</sup> | P value <sup>5</sup> |
|----------------------------------------------------|----------------------------------------------------|----------------------------------------------------|------------------------------------------------------|--------------------------------------|--------------------------------------|----------------------------------------|-----------------------------------|----------------------|
| DHH_HvOs                                           | 2                                                  | 2.63                                               | 0.76                                                 | 0                                    | 2.25                                 | 0.00                                   | 7.70                              | 2.609E-01            |
| DHH_ZmHv                                           | 87                                                 | 80.35                                              | 1.08                                                 | 84                                   | 81.80                                | 1.03                                   | 6.90                              | 3.302E-01            |
| DHH_ZmOs                                           | 24                                                 | 30.92                                              | 0.78                                                 | 166                                  | 156.37                               | 1.06                                   | 9.56                              | 1.444E-01            |
| DTA_HvOs                                           | 10                                                 | 17.10                                              | 0.58                                                 | 4                                    | 4.03                                 | 0.99                                   | 10.84                             | 9.334E-02            |
| DTA_ZmHv                                           | 15                                                 | 11.79                                              | 1.27                                                 | 7                                    | 11.99                                | 0.58                                   | 8.97                              | 1.754E-01            |
| DTA_ZmOs                                           | 22                                                 | 20.65                                              | 1.07                                                 | 18                                   | 24.81                                | 0.73                                   | 21.00                             | 1.265E-02            |
| DTC_HvOs                                           | 20                                                 | 19.43                                              | 1.03                                                 | 80                                   | 96.00                                | 0.83                                   | 10.48                             | 1.058E-01            |
| DTC_ZmHv                                           | 63                                                 | 52.26                                              | 1.21                                                 | 51                                   | 51.40                                | 0.99                                   | 14.77                             | 9.746E-02            |
| DTC_ZmOs                                           | 7                                                  | 2.78                                               | 2.51                                                 | 4                                    | 5.43                                 | 0.74                                   | 13.71                             | 3.302E-02            |
| DTH_HvOs                                           | 9                                                  | 5.58                                               | 1.61                                                 | 17                                   | 23.14                                | 0.73                                   | 9.01                              | 1.731E-01            |
| DTH_ZmHv                                           | 91                                                 | 64.99                                              | 1.40                                                 | 41                                   | 65.78                                | 0.62                                   | 62.02                             | 5.467E-10            |
| DTH_ZmOs                                           | 29                                                 | 21.00                                              | 1.38                                                 | 69                                   | 107.15                               | 0.64                                   | 47.43                             | 1.536E-08            |
| DTM_HvOs                                           | 39                                                 | 31.14                                              | 1.25                                                 | 28                                   | 32.26                                | 0.87                                   | 8.12                              | 2.294E-01            |
| DTM_ZmHv                                           | 21                                                 | 16.51                                              | 1.27                                                 | 16                                   | 16.30                                | 0.98                                   | 9.46                              | 3.962E-01            |
| DTM_ZmOs                                           | 32                                                 | 27.31                                              | 1.17                                                 | 4                                    | 9.93                                 | 0.40                                   | 18.56                             | 4.970E-03            |
| DTT_HvOs                                           | 8                                                  | 4.20                                               | 1.90                                                 | 14                                   | 18.02                                | 0.78                                   | 12.34                             | 5.477E-02            |
| DTT_ZmHv                                           | 68                                                 | 60.47                                              | 1.12                                                 | 53                                   | 61.26                                | 0.87                                   | 11.91                             | 2.187E-01            |
| DTT_ZmOs                                           | 22                                                 | 18.97                                              | 1.16                                                 | 95                                   | 100.96                               | 0.94                                   | 7.93                              | 5.416E-01            |
| RLC_HvOs                                           | 63                                                 | 71.72                                              | 0.88                                                 | 201                                  | 171.07                               | 1.17                                   | 19.10                             | 2.432E-02            |
| RLC_ZmHv                                           | 119                                                | 127.99                                             | 0.93                                                 | 113                                  | 127.36                               | 0.89                                   | 26.53                             | 1.670E-03            |
| RLC_ZmOs                                           | 72                                                 | 63.94                                              | 1.13                                                 | 110                                  | 109.66                               | 1.00                                   | 5.57                              | 7.824E-01            |
| RLG_HvOs                                           | 56                                                 | 67.80                                              | 0.83                                                 | 167                                  | 147.35                               | 1.13                                   | 11.49                             | 2.434E-01            |
| RLG_ZmHv                                           | 121                                                | 127.79                                             | 0.95                                                 | 133                                  | 127.56                               | 1.04                                   | 20.18                             | 1.684E-02            |
| RLG_ZmOs                                           | 63                                                 | 67.80                                              | 0.93                                                 | 116                                  | 128.26                               | 0.90                                   | 8.70                              | 4.650E-01            |
| RLX_HvOs                                           | 304                                                | 269.22                                             | 1.13                                                 | 335                                  | 359.98                               | 0.93                                   | 36.97                             | 2.660E-05            |
| RLX_ZmHv                                           | 239                                                | 216.58                                             | 1.10                                                 | 180                                  | 213.27                               | 0.84                                   | 17.65                             | 3.948E-02            |
| RLX_ZmOs                                           | 308                                                | 288.15                                             | 1.07                                                 | 84                                   | 93.56                                | 0.90                                   | 17.20                             | 4.562E-02            |

<sup>1</sup> Hv = *Hordeum vulgare*, Os = *Oryza sativa*, Zm = *Zea mays*. TE classification codes from Wicker 2007

<sup>2</sup> See model above for coincidence/dissonance definitions. These numbers represent the observed occurrences in each comparison

<sup>3</sup> Expected values calculated by product of proportions of lineage specific TEs and proportions of lineage specific mCHH islands

<sup>4</sup> Enrichment = observed / expected

<sup>5</sup> Chi-square test of equality between observed and expected proportions of lineage specific mCHH islands and TEs

## Supplemental Table 5. Repeat annotations

| Species                   | Repeat annotation                                        | Source                                                                                                              |
|---------------------------|----------------------------------------------------------|---------------------------------------------------------------------------------------------------------------------|
| Oryza sativa              | irgsp1_repeat_unit.gff                                   | <a href="https://rapdb.dna.affrc.go.jp/download/irgsp1.html">https://rapdb.dna.affrc.go.jp/download/irgsp1.html</a> |
| Sorghum bicolor           | Sbicolor_454_v3.1.1.repeatmasked_assembly_v3.0.1.gff3.gz | <a href="https://phytozome.jgi.doe.gov/">https://phytozome.jgi.doe.gov/</a>                                         |
| Zea mays                  | B73.structuralTEv2.fulllength.2018-09-19.gff3            | <a href="https://mcstitzer.github.io/maize_TEs/">https://mcstitzer.github.io/maize_TEs/</a>                         |
| Hordeum vulgare           | Barley TE annotation v2_18Aug16.tsv                      | <a href="https://doi.org/10.5447/IPK/2016/16">https://doi.org/10.5447/IPK/2016/16</a>                               |
| Brachypodium distachyon   | Bdistachyon_556_v3.2.repeatmasked_assembly_v3.0.gff3.gz  | <a href="https://phytozome.jgi.doe.gov/">https://phytozome.jgi.doe.gov/</a>                                         |
| Setaria italica           | Sitalica_312_v2.2.repeatmasked_assembly_v2.gff3.gz       | <a href="https://phytozome.jgi.doe.gov/">https://phytozome.jgi.doe.gov/</a>                                         |
| Triticum urartu           | Triticum_urartu.GCA_000347455.1.30.gff3                  | <a href="https://plants.ensembl.org/">https://plants.ensembl.org/</a>                                               |
| Phyllostachys heterocycla | P_heterocycla_v1.0.repeats.detail                        | <a href="http://server.ncgr.ac.cn/bamboo/down.php">http://server.ncgr.ac.cn/bamboo/down.php</a>                     |

## Supplemental Table 6. Genome information

| Species                   | Bisulfite seq mean coverage | Genome assembly                             | Source                                                                                  |
|---------------------------|-----------------------------|---------------------------------------------|-----------------------------------------------------------------------------------------|
| Oryza sativa              | 60.3                        | Osativa_323_v7.0.fa                         | <a href="https://phytozome.jgi.doe.gov/">https://phytozome.jgi.doe.gov/</a>             |
| Sorghum bicolor           | 17.87                       | Sbicolor_313_v3.0.fa                        | <a href="https://phytozome.jgi.doe.gov/">https://phytozome.jgi.doe.gov/</a>             |
| Zea mays                  | 6.7                         | Zea_mays.AGPv4.dna.chromosome.all.fa        | <a href="http://plants.ensembl.org/index.html">http://plants.ensembl.org/index.html</a> |
| Hordeum vulgare           | 16.99                       | 150831_barley_pseudomolecules.fa            | <a href="https://webblast.ipk-gatersleben.de/">https://webblast.ipk-gatersleben.de/</a> |
| Brachypodium distachyon   | 81.07                       | Bdistachyon_314_v3.0.fa                     | <a href="https://phytozome.jgi.doe.gov/">https://phytozome.jgi.doe.gov/</a>             |
| Setaria italica           | 17.88                       | Sitalica_312_v2.fa                          | <a href="https://phytozome.jgi.doe.gov/">https://phytozome.jgi.doe.gov/</a>             |
| Triticum urartu           | 14.88                       | Triticum_urartu.ASM34745v1.31.dna.genome.fa | <a href="http://plants.ensembl.org/index.html">http://plants.ensembl.org/index.html</a> |
| Phyllostachys heterocycla | 18.17                       | P_heterocycla_v1.0.Scaffolds.fa             | <a href="http://server.ncgr.ac.cn/bamboo/">http://server.ncgr.ac.cn/bamboo/</a>         |
